# Supplementary material
Source: PubMed Central journal article supplement (PMC8482474)

## OSF HealthCare End-to-End Solution Digital Led Response

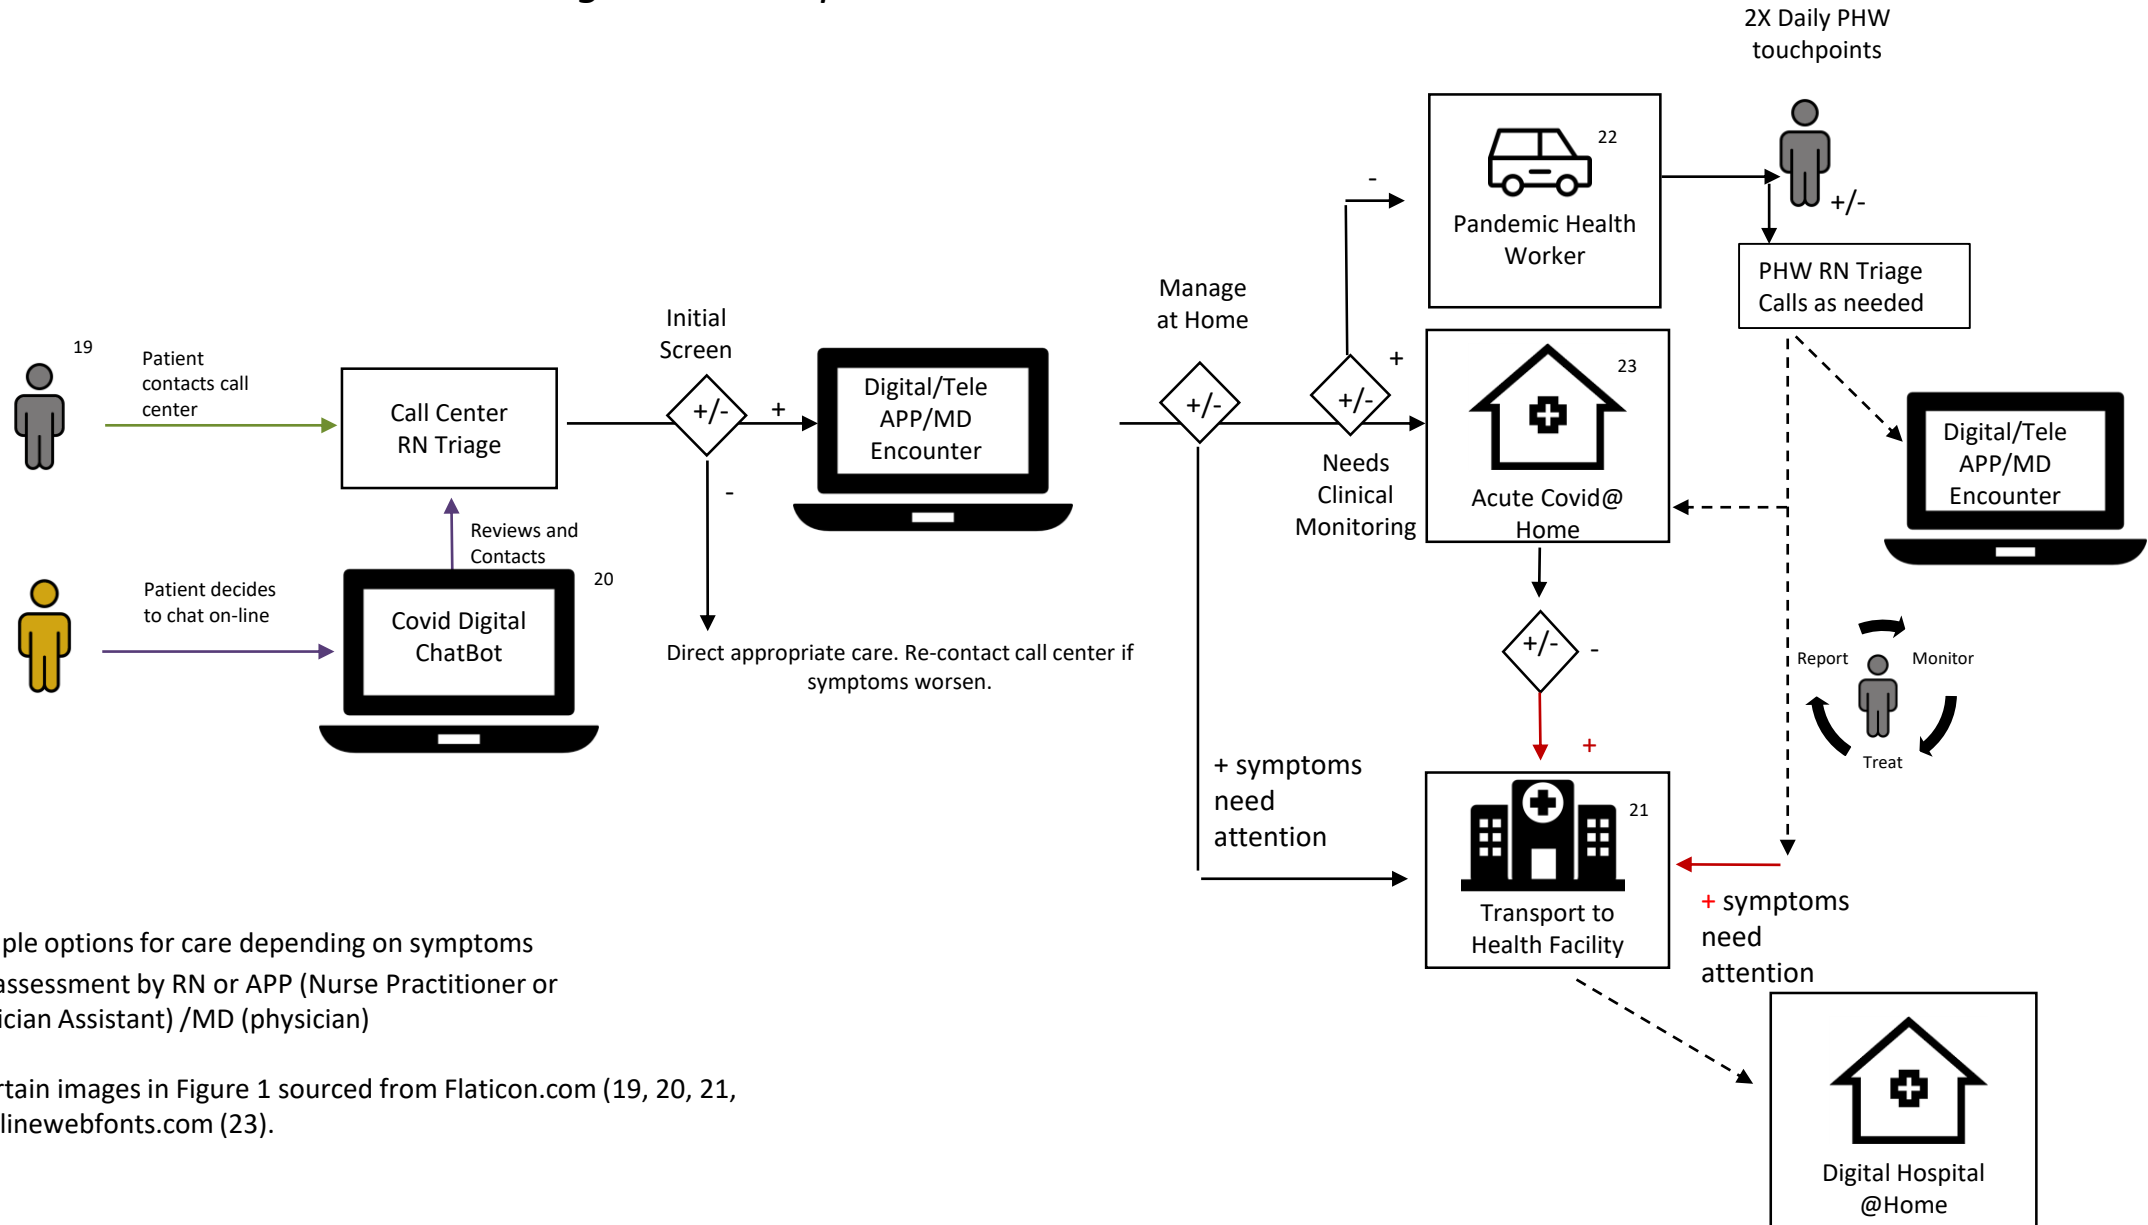

Supplement: mmc1.pdf [file mmc1.pdf]
